# Supplementary material
Source: MDPI journal article supplement (https://www.mdpi.com/1424-8247/16/5/646)
Supplement: s1 [file s1]

**Supplementary Material:** Polytherapy and multimorbidity pattern of users of anti-VEGF drugs and dexamethasone for the treatment of age-related macular degeneration and other vascular retinopathies in clinical practice

Ersilia Lucenteforte<sup>1</sup>, Marco Finocchietti<sup>2</sup>, Antonio Addis<sup>2</sup>, Mauro Tettamanti<sup>3</sup>, Monica Varano<sup>4</sup>, Mariacristina Parravano<sup>4,\*</sup>, and Gianni Virgili<sup>5</sup>.

<sup>1</sup>Department of Clinical and Experimental Medicine, University of Pisa, Pisa, Italy

<sup>2</sup>Department of Epidemiology, Lazio Regional Health Service, Rome, Italy

<sup>3</sup> Istituto di Ricerche Farmacologiche Mario Negri, Department of Health Policy, Milan, Italy

<sup>4</sup>IRCCS Fondazione Bietti, Rome, Italy

<sup>5</sup>Department of NEUROFARBA, Eye Clinic, Careggi University Hospital, University of Florence, Florence, Italy

|                                                                                                                                                                |    |
|----------------------------------------------------------------------------------------------------------------------------------------------------------------|----|
| <b>Figure S1.</b> Patient selection scheme .....                                                                                                               | 2  |
| <b>Table S1.</b> Codes for intravitreal injection (ATC), comorbidity (ICD9M and EXE), concomitant drugs (ATC), and Injections, procedures and diagnostics..... | 2  |
| <b>Table S2.</b> Comorbidities by age.....                                                                                                                     | 4  |
| <b>Table S3.</b> Comorbidities by gender.....                                                                                                                  | 5  |
| <b>Table S4.</b> Polytherapy by age .....                                                                                                                      | 6  |
| <b>Table S5.</b> Polytherapy by gender .....                                                                                                                   | 7  |
| <b>Table S6.</b> Adherence and discontinuation during follow-up for patients with proxy od AMD. ....                                                           | 8  |
| <b>Table S7.</b> History of comorbidities for patients with proxy od AMD. ....                                                                                 | 9  |
| <b>Table S8.</b> History of concomitant drugs for patients with proxy od AMD. ....                                                                             | 10 |
| <b>Table S9.</b> History of proxy of diabetes-related eye disease, glaucoma, use of ophthalmic services and binocularity by age.....                           | 11 |
| <b>Table S10.</b> History of proxy of diabetes-related eye disease, glaucoma, use of ophthalmic services and binocularity by gender.....                       | 12 |

**Figure S1.** Patient selection scheme

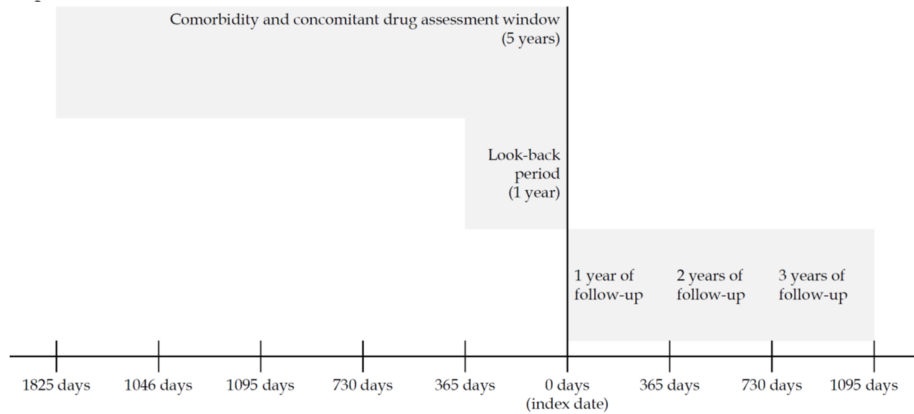

**Table S1.** Codes for intravitreal injection (ATC), comorbidity (ICD9M and EXE), concomitant drugs (ATC), and Injections, procedures and diagnostics

| Intravitreal injection (from DDRUG)     | Code                                                                                                                             |
|-----------------------------------------|----------------------------------------------------------------------------------------------------------------------------------|
| bevacizumab                             | L01XC07<br>0G00126001 (galenic preparation)                                                                                      |
| ranibizumab                             | S01LA04                                                                                                                          |
| pegaptanib                              | S01LA03                                                                                                                          |
| aflibercept                             | S01LA05, L01XX44                                                                                                                 |
| dexamethasone                           | A01AC02<br>C05AA09<br>D07AB19<br>D07XB05<br>D10AA03<br>H02AB02<br>H02AB02<br>R01AD03<br>S01BA01<br>S01CB01<br>S02BA06<br>S03BA01 |
| <b>Comorbidity (from HOSP/EXE)</b>      |                                                                                                                                  |
| Psychiatric or mental health conditions |                                                                                                                                  |
| Anxiety                                 | 300                                                                                                                              |
| Bipolar disease                         | 296.00-296.06<br>296.4-296.8<br>EXE: 044.296.4-044.296.7                                                                         |
| Delirium                                | 293<br>297.1<br>780.09                                                                                                           |
| Dementia                                | 290.0-290.43<br>294.8<br>EXE: 011.290.0-011.290.4                                                                                |
| Depression                              | 296.2-296.4<br>311<br>EXE: 044.296.2-044.296.3                                                                                   |
| Non-schizophrenic psychosis             | 298.x<br>EXE: 044.297-0.44.299                                                                                                   |
| Schizophrenia                           | 295.x<br>EXE: 044.295.x                                                                                                          |
| Cardio/cerebrovascular diseases         |                                                                                                                                  |
| Arrhythmia                              | 427.60<br>427.9<br>EXE: 0A02.427                                                                                                 |
| Congestive heart failure                | 428.0<br>EXE: 021.428                                                                                                            |
| Ischaemic heart disease                 | 414.8-414.9<br>EXE: 0A02.414, 002.414                                                                                            |

|                                                             |                                                                                       |
|-------------------------------------------------------------|---------------------------------------------------------------------------------------|
| Stroke                                                      | 430<br>431<br>432.x<br>434.x<br>EXE: 0B02.433-0B02.437                                |
| Hypertension                                                | 401.0-405.9<br>EXE: 0A31, 031.x, 0031.x                                               |
| Peripheral arterial disease                                 | 444.22<br>EXE: 0C02.444                                                               |
| Valve disorders                                             | 394-397<br>424.x<br>EXE: 0A02.394-0A02.397                                            |
| Venous thrombosis embolism                                  | 452.x-453.x<br>EXE: 0C02.452-0C02.453                                                 |
| Other conditions                                            |                                                                                       |
| Diabetes of use of antidiabetics (ATC: A10*)                | 250<br>EXE: 013.250                                                                   |
| COPD                                                        | 491.2<br>496<br>EXE: 057                                                              |
| Osteoporosis                                                | 733.x                                                                                 |
| Parkinson's disease                                         | 332.x<br>EXE: 038.333.0-038.333.1                                                     |
| Epilepsy                                                    | 345.x<br>EXE: RF0060, 017.345                                                         |
| Hip fracture                                                | 808.x                                                                                 |
| Pneumonia                                                   | 480-486                                                                               |
| Glaucoma or use of antiglaucomatous medication (ATC: S01*)  |                                                                                       |
| <b>Concomitant drugs (from DDRUG)</b>                       |                                                                                       |
| Digoxin                                                     | C01AA05                                                                               |
| NSAIDs                                                      | M01                                                                                   |
| Low Dosage Aspirin                                          | B01AC06<br>B01AC30                                                                    |
| Antibacterial                                               | J01                                                                                   |
| Anti-thrombotic                                             | B01                                                                                   |
| Agents for peptic ulcers                                    | A02                                                                                   |
| Organic nitrates                                            | C01DA                                                                                 |
| Corticosteroids                                             | H02                                                                                   |
| Antihypertensives                                           | C02                                                                                   |
| Anti-dyslipidaemic agents                                   | C10                                                                                   |
| <b>Injections, procedures and diagnostics (from OUTPAT)</b> |                                                                                       |
| Argon-laser                                                 | 14.34<br>14.24.1                                                                      |
|                                                             |                                                                                       |
| Specialist encounter                                        | Visit: 95.02<br>or other visits: 95.01<br>or control visits: 89.01                    |
| OCT                                                         | 95.17                                                                                 |
| Fluorescence imaging                                        | 95.12                                                                                 |
| Fluorescence imaging with indocyanine                       | 95.12.1                                                                               |
| Laser photocoagulation                                      |                                                                                       |
| binocularity                                                | (2 injections within 25 days considering the old "catalogo prestazioni ambulatoriali" |
| injections                                                  | 14.79.1                                                                               |
| Fundus photographs                                          | 95.11.1                                                                               |

**Table S2.** Comorbidities by age

|                                                                | 64-  |       | 65-69 |       | 70-74 |       | 75-79 |       | 80-84 |       | 85+  |       |
|----------------------------------------------------------------|------|-------|-------|-------|-------|-------|-------|-------|-------|-------|------|-------|
| <b>TOTAL</b>                                                   | 3504 |       | 2026  |       | 2818  |       | 3174  |       | 2764  |       | 1940 |       |
| <b>Charlson Comorbidity Index</b>                              |      |       |       |       |       |       |       |       |       |       |      |       |
| mean (SD)                                                      | 0.4  | 1.2   | 0.5   | 1.3   | 0.5   | 1.2   | 0.4   | 1.2   | 0.4   | 1.2   | 0.4  | 1.0   |
| <b>Number of comorbidities (one of those present in Table)</b> |      |       |       |       |       |       |       |       |       |       |      |       |
| 0                                                              | 1688 | 48.2% | 793   | 39.1% | 1253  | 44.5% | 1479  | 46.6% | 1299  | 47.0% | 959  | 49.4% |
| 1-2                                                            | 1594 | 45.5% | 1047  | 51.7% | 1332  | 47.3% | 1452  | 45.7% | 1239  | 44.8% | 804  | 41.4% |
| 3-5                                                            | 215  | 6.1%  | 182   | 9.0%  | 226   | 8.0%  | 236   | 7.4%  | 220   | 8.0%  | 174  | 9.0%  |
| 6+                                                             | 7    | 0.2%  | 4     | 0.2%  | 7     | 0.2%  | 7     | 0.2%  | 6     | 0.2%  | 3    | 0.2%  |
| <b>Psychiatric or mental health conditions, N (%)</b>          |      |       |       |       |       |       |       |       |       |       |      |       |
| Anxiety                                                        | 39   | 1.1%  | 13    | 0.6%  | 25    | 0.9%  | 27    | 0.9%  | 16    | 0.6%  | 12   | 0.6%  |
| Bipolar disease                                                | 9    | 0.3%  | 4     | 0.2%  | 2     | 0.1%  | 9     | 0.3%  | 3     | 0.1%  | 0    | 0.0%  |
| Delirium                                                       | 3    | 0.1%  | 4     | 0.2%  | 2     | 0.1%  | 2     | 0.1%  | 3     | 0.1%  | 1    | 0.1%  |
| Dementia                                                       | 0    | 0.0%  | 0     | 0.0%  | 3     | 0.1%  | 11    | 0.3%  | 6     | 0.2%  | 8    | 0.4%  |
| Depression                                                     | 15   | 0.4%  | 6     | 0.3%  | 7     | 0.2%  | 11    | 0.3%  | 5     | 0.2%  | 2    | 0.1%  |
| Non-schizophrenic psychosis                                    | 10   | 0.3%  | 5     | 0.2%  | 3     | 0.1%  | 5     | 0.2%  | 3     | 0.1%  | 3    | 0.2%  |
| Schizophrenia                                                  | 13   | 0.4%  | 0     | 0.0%  | 2     | 0.1%  | 1     | 0.0%  | 1     | 0.0%  | 0    | 0.0%  |
| <b>Cardio/cerebrovascular diseases, N(%)</b>                   |      |       |       |       |       |       |       |       |       |       |      |       |
| Arrhythmia                                                     | 28   | 0.8%  | 27    | 1.3%  | 29    | 1.0%  | 65    | 2.0%  | 58    | 2.1%  | 44   | 2.3%  |
| Congestive heart failure                                       | 51   | 1.5%  | 33    | 1.6%  | 52    | 1.8%  | 50    | 1.6%  | 62    | 2.2%  | 75   | 3.9%  |
| Ischemic heart disease                                         | 169  | 4.8%  | 164   | 8.1%  | 231   | 8.2%  | 236   | 7.4%  | 207   | 7.5%  | 159  | 8.2%  |
| Stroke                                                         | 38   | 1.1%  | 36    | 1.8%  | 26    | 0.9%  | 43    | 1.4%  | 51    | 1.8%  | 30   | 1.5%  |
| Hypertension                                                   | 798  | 22.8% | 676   | 33.4% | 900   | 31.9% | 1033  | 32.5% | 924   | 33.4% | 630  | 32.5% |
| Peripheral arterial disease                                    | 6    | 0.2%  | 7     | 0.3%  | 6     | 0.2%  | 5     | 0.2%  | 2     | 0.1%  | 2    | 0.1%  |
| Valve disorders                                                | 24   | 0.7%  | 25    | 1.2%  | 37    | 1.3%  | 42    | 1.3%  | 53    | 1.9%  | 43   | 2.2%  |
| Venous thrombosis embolism                                     | 40   | 1.1%  | 5     | 0.2%  | 7     | 0.2%  | 6     | 0.2%  | 11    | 0.4%  | 6    | 0.3%  |
| <b>Other conditions, N(%)</b>                                  |      |       |       |       |       |       |       |       |       |       |      |       |
| Diabetes                                                       | 1432 | 40.9% | 919   | 45.4% | 1069  | 37.9% | 970   | 30.6% | 763   | 27.6% | 408  | 21.0% |
| COPD                                                           | 26   | 0.7%  | 36    | 1.8%  | 54    | 1.9%  | 74    | 2.3%  | 98    | 3.5%  | 85   | 4.4%  |
| Osteoporosis                                                   | 10   | 0.3%  | 7     | 0.3%  | 19    | 0.7%  | 18    | 0.6%  | 21    | 0.8%  | 31   | 1.6%  |
| Parkinson's disease                                            | 3    | 0.1%  | 5     | 0.2%  | 5     | 0.2%  | 6     | 0.2%  | 6     | 0.2%  | 13   | 0.7%  |
| Epilepsy                                                       | 19   | 0.5%  | 9     | 0.4%  | 11    | 0.4%  | 11    | 0.3%  | 11    | 0.4%  | 6    | 0.3%  |
| Hip fracture                                                   | 2    | 0.1%  | 3     | 0.1%  | 4     | 0.1%  | 5     | 0.2%  | 15    | 0.5%  | 6    | 0.3%  |
| Pneumonia                                                      | 55   | 1.6%  | 26    | 1.3%  | 49    | 1.7%  | 67    | 2.1%  | 63    | 2.3%  | 56   | 2.9%  |

**Table S3.** Comorbidities by gender

|                                                                | <b>Male</b> |       | <b>Female</b> |       |
|----------------------------------------------------------------|-------------|-------|---------------|-------|
| <b>TOTAL</b>                                                   | 7621        |       | 8605          |       |
| <b>Charlson Comorbidity Index</b>                              |             |       |               |       |
| mean (SD)                                                      | 0.6         | (1.3) | 0.4           | (1.0) |
| <b>Number of comorbidities (one of those present in Table)</b> |             |       |               |       |
| 0                                                              | 3020        | 39.6% | 4451          | 51.7% |
| 1-2                                                            | 3797        | 49.8% | 3671          | 42.7% |
| 3-5                                                            | 777         | 10.2% | 476           | 5.5%  |
| 6+                                                             | 27          | 0.4%  | 7             | 0.1%  |
| <b>Psychiatric or mental health conditions, N (%)</b>          |             |       |               |       |
| Anxiety                                                        | 45          | 0.6%  | 87            | 1.0%  |
| Bipolar disease                                                | 9           | 0.1%  | 18            | 0.2%  |
| Delirium                                                       | 5           | 0.1%  | 10            | 0.1%  |
| Dementia                                                       | 12          | 0.2%  | 16            | 0.2%  |
| Depression                                                     | 14          | 0.2%  | 32            | 0.4%  |
| Non-schizophrenic psychosis                                    | 11          | 0.1%  | 18            | 0.2%  |
| Schizophrenia                                                  | 6           | 0.1%  | 11            | 0.1%  |
| <b>Cardio/cerebrovascular diseases, N(%)</b>                   |             |       |               |       |
| Arrhythmia                                                     | 156         | 2.0%  | 95            | 1.1%  |
| Congestive heart failure                                       | 176         | 2.3%  | 147           | 1.7%  |
| Ischemic heart disease                                         | 829         | 10.9% | 337           | 3.9%  |
| Stroke                                                         | 131         | 1.7%  | 93            | 1.1%  |
| Hypertension                                                   | 2496        | 32.8% | 2465          | 28.6% |
| Peripheral arterial disease                                    | 18          | 0.2%  | 10            | 0.1%  |
| Valve disorders                                                | 118         | 1.5%  | 106           | 1.2%  |
| Venous thrombosis embolism                                     | 41          | 0.5%  | 34            | 0.4%  |
| <b>Other conditions, N(%)</b>                                  |             |       |               |       |
| Diabetes                                                       | 3100        | 40.7% | 2461          | 28.6% |
| COPD                                                           | 223         | 2.9%  | 150           | 1.7%  |
| Osteoporosis                                                   | 27          | 0.4%  | 79            | 0.9%  |
| Parkinson's disease                                            | 23          | 0.3%  | 15            | 0.2%  |
| Epilepsy                                                       | 30          | 0.4%  | 37            | 0.4%  |
| Hip fracture                                                   | 11          | 0.1%  | 24            | 0.3%  |
| Pneumonia                                                      | 197         | 2.6%  | 119           | 1.4%  |

**Table S4.** Polytherapy by age

|                                         | <b>64-</b>      |       | <b>65-69</b>     |       | <b>70-74</b>     |       | <b>75-79</b>     |       | <b>80-84</b>     |       | <b>85+</b>       |       |
|-----------------------------------------|-----------------|-------|------------------|-------|------------------|-------|------------------|-------|------------------|-------|------------------|-------|
| <b>TOTAL</b>                            | 3504            |       | 2026             |       | 2818             |       | 3174             |       | 2764             |       | 1940             |       |
| <b>Concomitant drugs</b>                |                 |       |                  |       |                  |       |                  |       |                  |       |                  |       |
| Mean $\pm$ SD                           | 6.5 $\pm$ 5.0   |       | 8.6 $\pm$ 5.2    |       | 9.0 $\pm$ 5.2    |       | 9.3 $\pm$ 5.2    |       | 9.7 $\pm$ 5.2    |       | 9.5 $\pm$ 5.2    |       |
| Median (IQR)                            | 6.0 (3.0 - 9.0) |       | 8.0 (5.0 - 12.0) |       | 8.0 (5.0 - 12.0) |       | 9.0 (6.0 - 12.0) |       | 9.0 (6.0 - 13.0) |       | 9.0 (6.0 - 12.0) |       |
| Min - Max                               | 0.0 - 29.0      |       | 0.0 - 39.0       |       | 0.0 - 35.0       |       | 0.0 - 37.0       |       | 0.0 - 46.0       |       | 0.0 - 52.0       |       |
| <b>Number of different drugs, N (%)</b> |                 |       |                  |       |                  |       |                  |       |                  |       |                  |       |
| 0                                       | 268             | 7.6%  | 40               | 2.0%  | 52               | 1.8%  | 41               | 1.3%  | 24               | 0.9%  | 22               | 1.1%  |
| 1-2                                     | 532             | 15.2% | 171              | 8.4%  | 181              | 6.4%  | 169              | 5.3%  | 116              | 4.2%  | 80               | 4.1%  |
| 3-5                                     | 961             | 27.4% | 397              | 19.6% | 535              | 19.0% | 573              | 18.1% | 430              | 15.6% | 306              | 15.8% |
| 6-9                                     | 887             | 25.3% | 625              | 30.8% | 861              | 30.6% | 1051             | 33.1% | 916              | 33.1% | 652              | 33.6% |
| 10+                                     | 856             | 24.4% | 793              | 39.1% | 1189             | 42.2% | 1340             | 42.2% | 1278             | 46.2% | 880              | 45.4% |
| <b>Type of drug, N (%)</b>              |                 |       |                  |       |                  |       |                  |       |                  |       |                  |       |
| Digoxin                                 | 15              | 0.4%  | 12               | 0.6%  | 27               | 1.0%  | 58               | 1.8%  | 89               | 3.2%  | 99               | 5.1%  |
| NSAIDs                                  | 1216            | 34.7% | 915              | 45.2% | 1336             | 47.4% | 1489             | 46.9% | 1331             | 48.2% | 850              | 43.8% |
| Low dosage aspirin                      | 761             | 21.7% | 716              | 35.3% | 1096             | 38.9% | 1239             | 39.0% | 1154             | 41.8% | 794              | 40.9% |
| Antibacterial                           | 2042            | 58.3% | 1302             | 64.3% | 1829             | 64.9% | 2027             | 63.9% | 1781             | 64.4% | 1226             | 63.2% |
| Anti-thrombotic                         | 1184            | 33.8% | 971              | 47.9% | 1510             | 53.6% | 1832             | 57.7% | 1735             | 62.8% | 1254             | 64.6% |
| Drugs for peptic ulcers                 | 1366            | 39.0% | 1112             | 54.9% | 1672             | 59.3% | 1939             | 61.1% | 1831             | 66.2% | 1289             | 66.4% |
| Organic nitrates                        | 64              | 1.8%  | 80               | 3.9%  | 124              | 4.4%  | 147              | 4.6%  | 187              | 6.8%  | 213              | 11.0% |
| Corticosteroids                         | 563             | 16.1% | 356              | 17.6% | 498              | 17.7% | 600              | 18.9% | 523              | 18.9% | 306              | 15.8% |
| Antihypertensives                       | 149             | 4.3%  | 138              | 6.8%  | 212              | 7.5%  | 237              | 7.5%  | 196              | 7.1%  | 127              | 6.5%  |
| Anti-dyslipidaemic agents               | 1035            | 29.5% | 938              | 46.3% | 1360             | 48.3% | 1491             | 47.0% | 1284             | 46.5% | 755              | 38.9% |

**Table S5.** Polytherapy by gender

|                                         | <b>Male</b>      |       | <b>Female</b>    |       |
|-----------------------------------------|------------------|-------|------------------|-------|
| <b>TOTAL</b>                            | 7621             |       | 8605             |       |
| <b>Concomitant drugs</b>                |                  |       |                  |       |
| Mean ± SD                               | 8.5 ± 5.3        |       | 8.8 ± 5.2        |       |
| Median (IQR)                            | 8.0 (5.0 - 12.0) |       | 8.0 (5.0 - 12.0) |       |
| Min - Max                               | 0.0 - 46.0       |       | 0.0 - 52,0       |       |
| <b>Number of different drugs, N (%)</b> |                  |       |                  |       |
| 0                                       | 228              | 3.0%  | 219              | 2.5%  |
| 1-2                                     | 614              | 8.1%  | 635              | 7.4%  |
| 3-5                                     | 1565             | 20.5% | 1637             | 19.0% |
| 6-9                                     | 2322             | 30.5% | 2670             | 31.0% |
| 10+                                     | 2892             | 37.9% | 3444             | 40.0% |
| <b>Type of drug, N (%)</b>              |                  |       |                  |       |
| Digoxin                                 | 121              | 1.6%  | 179              | 2.1%  |
| NSAIDs                                  | 2942             | 38.6% | 4195             | 48.8% |
| Low dosage aspirin                      | 2961             | 38.9% | 2799             | 32.5% |
| Antibacterial                           | 4669             | 61.3% | 5538             | 64.4% |
| Anti-thrombotic                         | 4272             | 56.1% | 4214             | 49.0% |
| Drugs for peptic ulcers                 | 4138             | 54.3% | 5071             | 58.9% |
| Organic nitrates                        | 440              | 5.8%  | 375              | 4.4%  |
| Corticosteroids                         | 1213             | 15.9% | 1633             | 19.0% |
| Antihypertensives                       | 583              | 7.6%  | 476              | 5.5%  |
| Anti-dyslipidaemic agents               | 3281             | 43.1% | 3582             | 41.6% |

**Table S6.** Adherence and discontinuation during follow-up for patients with proxy od AMD.

|                                                                                                                   | Overall   |       | Aflibercept |       | Bevacizumab |       | Dexamethasone |       | Ranibizumab |       | Pegaptanib |       |
|-------------------------------------------------------------------------------------------------------------------|-----------|-------|-------------|-------|-------------|-------|---------------|-------|-------------|-------|------------|-------|
| <b>TOTAL</b>                                                                                                      | 8025      |       | 2363        |       | 295         |       | 808           |       | 4453        |       | 106        |       |
| <b>Number of injections in the follow-up period, Mean (SD)</b>                                                    |           |       |             |       |             |       |               |       |             |       |            |       |
| Year 1 (including the index date injection)                                                                       | 3.9 (2.1) |       | 4.6 (2.1)   |       | 3.6 (2.1)   |       | 1.9 (1.2)     |       | 3.9 (2.0)   |       | 3.8 (1.7)  |       |
| Year 2                                                                                                            | 1.4 (2.0) |       | 1.7 (2.2)   |       | 1.1 (1.9)   |       | 0.7 (1.3)     |       | 1.3 (2.0)   |       | 1.1 (1.8)  |       |
| Year 3 (cohort with index date<=31/12/18 only)                                                                    | 1.1 (1.8) |       | 1.4 (2.1)   |       | 0.8 (1.5)   |       | 0.5 (1.1)     |       | 1.0 (1.8)   |       | 0.6 (1.3)  |       |
| <b>Number of contact in the follow-up period, Mean (SD) (specialist examinations)</b>                             |           |       |             |       |             |       |               |       |             |       |            |       |
| Year 1 (including the index date injection)                                                                       | 9.0 (6.7) |       | 9.0 (6.3)   |       | 6.2 (4.3)   |       | 6.1 (4.4)     |       | 9.6 (7.1)   |       | 14.0 (8.7) |       |
| Year 2                                                                                                            | 3.7 (5.1) |       | 3.7 (4.7)   |       | 2.6 (3.9)   |       | 2.7 (3.7)     |       | 3.9 (5.4)   |       | 6.0 (7.4)  |       |
| Year 3 (cohort with index date<=31/12/18 only)                                                                    | 2.8 (4.5) |       | 3.0 (4.5)   |       | 1.8 (2.9)   |       | 1.8 (3.0)     |       | 3.0 (4.7)   |       | 3.5 (5.0)  |       |
| <b>Number of subjects with (at least) the first 3 doses in 90 days, N (%)</b>                                     | 3601      | 44,9% | 1272        | 53,8% | 80          | 27,1% | 4             | 0,5%  | 2223        | 49,9% | 22         | 20,8% |
| <b>At least 60 days without contact in the first year of follow-up and at least 90 days in the second, N (%)</b>  | 5492      | 68,4% | 1876        | 79,4% | 186         | 63,1% | 429           | 53,1% | 2928        | 65,8% | 73         | 68,9% |
| <b>At least 90 days without contact in the first year of follow-up and at least 180 days in the second, N (%)</b> | 4205      | 52,4% | 1283        | 54,3% | 129         | 43,7% | 427           | 52,8% | 2315        | 52,0% | 51         | 48,1% |



**Table S7.** History of comorbidities for patients with proxy od AMD.

|                                                                | Overall   |       | Aflibercept |       | Bevacizumab |       | Dexamethasone |       | Ranibizumab |       | Pegaptanib |       |
|----------------------------------------------------------------|-----------|-------|-------------|-------|-------------|-------|---------------|-------|-------------|-------|------------|-------|
| <b>TOTAL</b>                                                   | 8025      |       | 2363        |       | 295         |       | 808           |       | 4453        |       | 106        |       |
| <b>Charlson Comorbidity Index</b>                              |           |       |             |       |             |       |               |       |             |       |            |       |
| mean (SD)                                                      | 0.2 (0.8) |       | 0.2 (0.9)   |       | 0.2 (0.8)   |       | 0.3 (0.9)     |       | 0.2 (0.8)   |       | 0.3 (0.8)  |       |
| <b>Number of comorbidities (one of those present in Table)</b> |           |       |             |       |             |       |               |       |             |       |            |       |
| 0                                                              | 5567      | 69,4% | 1641        | 69,4% | 218         | 73,9% | 542           | 67,1% | 3092        | 69,4% | 74         | 69,8% |
| 1-2                                                            | 2224      | 27,7% | 644         | 27,3% | 73          | 24,7% | 237           | 29,3% | 1242        | 27,9% | 28         | 26,4% |
| 3-5                                                            | 231       | 2,9%  | 76          | 3,2%  | 4           | 1,4%  | 29            | 3,6%  | 118         | 2,6%  | 4          | 3,8%  |
| 6+                                                             | 3         | 0,0%  | 2           | 0,1%  | 0           | 0,0%  | 0             | 0,0%  | 1           | 0,0%  | 0          | 0,0%  |
| <b>Psychiatric or mental health conditions, N (%)</b>          |           |       |             |       |             |       |               |       |             |       |            |       |
| Anxiety                                                        | 63        | 0,8%  | 13          | 0,6%  | 0           | 0,0%  | 9             | 1,1%  | 41          | 0,9%  | 0          | 0,0%  |
| Bipolar disease                                                | 12        | 0,1%  | 3           | 0,1%  | 0           | 0,0%  | 2             | 0,2%  | 7           | 0,2%  | 0          | 0,0%  |
| Delirium                                                       | 3         | 0,0%  | 1           | 0,0%  | 0           | 0,0%  | 1             | 0,1%  | 1           | 0,0%  | 0          | 0,0%  |
| Dementia                                                       | 12        | 0,1%  | 1           | 0,0%  | 0           | 0,0%  | 3             | 0,4%  | 7           | 0,2%  | 1          | 0,9%  |
| Depression                                                     | 18        | 0,2%  | 5           | 0,2%  | 0           | 0,0%  | 3             | 0,4%  | 10          | 0,2%  | 0          | 0,0%  |
| Non-schizophrenic psychosis                                    | 7         | 0,1%  | 2           | 0,1%  | 0           | 0,0%  | 1             | 0,1%  | 4           | 0,1%  | 0          | 0,0%  |
| Schizophrenia                                                  | 4         | 0,0%  | 0           | 0,0%  | 0           | 0,0%  | 1             | 0,1%  | 3           | 0,1%  | 0          | 0,0%  |
| <b>Cardio/cerebrovascular diseases, N(%)</b>                   |           |       |             |       |             |       |               |       |             |       |            |       |
| Arrhythmia                                                     | 115       | 1,4%  | 47          | 2,0%  | 0           | 0,0%  | 15            | 1,9%  | 52          | 1,2%  | 1          | 0,9%  |
| Congestive heart failure                                       | 98        | 1,2%  | 24          | 1,0%  | 3           | 1,0%  | 9             | 1,1%  | 60          | 1,3%  | 2          | 1,9%  |
| Ischemic heart disease                                         | 370       | 4,6%  | 118         | 5,0%  | 12          | 4,1%  | 32            | 4,0%  | 195         | 4,4%  | 13         | 12,3% |
| Stroke                                                         | 93        | 1,2%  | 31          | 1,3%  | 5           | 1,7%  | 12            | 1,5%  | 44          | 1,0%  | 1          | 0,9%  |
| Hypertension                                                   | 2037      | 25,4% | 587         | 24,8% | 67          | 22,7% | 223           | 27,6% | 1133        | 25,4% | 27         | 25,5% |
| Peripheral arterial disease                                    | 6         | 0,1%  | 3           | 0,1%  | 0           | 0,0%  | 1             | 0,1%  | 2           | 0,0%  | 0          | 0,0%  |
| Valve disorders                                                | 107       | 1,3%  | 30          | 1,3%  | 1           | 0,3%  | 11            | 1,4%  | 63          | 1,4%  | 2          | 1,9%  |
| Venous thrombosis embolism                                     | 17        | 0,2%  | 4           | 0,2%  | 1           | 0,3%  | 4             | 0,5%  | 8           | 0,2%  | 0          | 0,0%  |
| <b>Other conditions, N(%)</b>                                  |           |       |             |       |             |       |               |       |             |       |            |       |
| Diabetes                                                       | 0         | 0,0%  | 0           | 0,0%  | 0           | 0,0%  | 0             | 0,0%  | 0           | 0,0%  | 0          | 0,0%  |
| COPD                                                           | 168       | 2,1%  | 53          | 2,2%  | 4           | 1,4%  | 15            | 1,9%  | 93          | 2,1%  | 3          | 2,8%  |
| Osteoporosis                                                   | 58        | 0,7%  | 23          | 1,0%  | 2           | 0,7%  | 2             | 0,2%  | 30          | 0,7%  | 1          | 0,9%  |
| Parkinson's disease                                            | 19        | 0,2%  | 5           | 0,2%  | 0           | 0,0%  | 2             | 0,2%  | 11          | 0,2%  | 1          | 0,9%  |
| Epilepsy                                                       | 34        | 0,4%  | 14          | 0,6%  | 0           | 0,0%  | 6             | 0,7%  | 13          | 0,3%  | 1          | 0,9%  |
| Hip fracture                                                   | 19        | 0,2%  | 8           | 0,3%  | 1           | 0,3%  | 2             | 0,2%  | 8           | 0,2%  | 0          | 0,0%  |
| Pneumonia                                                      | 112       | 1,4%  | 32          | 1,4%  | 3           | 1,0%  | 11            | 1,4%  | 66          | 1,5%  | 0          | 0,0%  |

**Table S8.** History of concomitant drugs for patients with proxy od AMD.

|                                         | <b>Overall</b> |       | <b>Aflibercept</b> |       | <b>Bevacizumab</b> |       | <b>Dexamethasone</b> |       | <b>Ranibizumab</b> |       | <b>Pegaptanib</b> |       |
|-----------------------------------------|----------------|-------|--------------------|-------|--------------------|-------|----------------------|-------|--------------------|-------|-------------------|-------|
| <b>TOTAL</b>                            | 8025           |       | 2363               |       | 295                |       | 808                  |       | 4453               |       | 106               |       |
| <b>Concomitant drugs</b>                |                |       |                    |       |                    |       |                      |       |                    |       |                   |       |
| Mean ± SD                               | 7.5 (4.5)      |       | 7.4 (4.3)          |       | 7.6 (4.4)          |       | 7.8 (4.2)            |       | 7.6 (4.7)          |       | 8.0 (4.7)         |       |
| Median (IQR)                            | 7.0 (4.0-10.0) |       | 7.0 (4.0-10.0)     |       | 7.0 (5.0-10.0)     |       | 7.0 (5.0-10.0)       |       | 7.0 (4.0-10.0)     |       | 7.0 (5.0-10.0)    |       |
| Min - Max                               | 0.0-52.0       |       | 0.0-28.0           |       | 0.0-36.0           |       | 0.0-25.0             |       | 0.0-52.0           |       | 0.0-25.0          |       |
| <b>Number of different drugs, N (%)</b> |                |       |                    |       |                    |       |                      |       |                    |       |                   |       |
| 0                                       | 221            | 2,8%  | 68                 | 2,9%  | 5                  | 1,7%  | 13                   | 1,6%  | 130                | 2,9%  | 5                 | 4,7%  |
| 1-2                                     | 748            | 9,3%  | 224                | 9,5%  | 32                 | 10,8% | 56                   | 6,9%  | 432                | 9,7%  | 4                 | 3,8%  |
| 3-5                                     | 1925           | 24,0% | 563                | 23,8% | 60                 | 20,3% | 203                  | 25,1% | 1077               | 24,2% | 22                | 20,8% |
| 6-9                                     | 2771           | 34,5% | 843                | 35,7% | 116                | 39,3% | 289                  | 35,8% | 1483               | 33,3% | 40                | 37,7% |
| 10+                                     | 2360           | 29,4% | 665                | 28,1% | 82                 | 27,8% | 247                  | 30,6% | 1331               | 29,9% | 35                | 33,0% |
| <b>Type of drug, N (%)</b>              |                |       |                    |       |                    |       |                      |       |                    |       |                   |       |
| Digoxin                                 | 120            | 1,5%  | 28                 | 1,2%  | 7                  | 2,4%  | 4                    | 0,5%  | 79                 | 1,8%  | 2                 | 1,9%  |
| NSAIDs                                  | 3563           | 44,4% | 988                | 41,8% | 141                | 47,8% | 347                  | 42,9% | 2037               | 45,7% | 50                | 47,2% |
| Low dosage aspirin                      | 2484           | 31,0% | 718                | 30,4% | 93                 | 31,5% | 306                  | 37,9% | 1328               | 29,8% | 39                | 36,8% |
| Antibacterial                           | 4932           | 61,5% | 1388               | 58,7% | 196                | 66,4% | 512                  | 63,4% | 2766               | 62,1% | 70                | 66,0% |
| Anti-thrombotic                         | 3483           | 43,4% | 1017               | 43,0% | 127                | 43,1% | 436                  | 54,0% | 1849               | 41,5% | 54                | 50,9% |
| Drugs for peptic ulcers                 | 4506           | 56,1% | 1297               | 54,9% | 168                | 56,9% | 460                  | 56,9% | 2520               | 56,6% | 61                | 57,5% |
| Organic nitrates                        | 328            | 4,1%  | 81                 | 3,4%  | 16                 | 5,4%  | 24                   | 3,0%  | 194                | 4,4%  | 13                | 12,3% |
| Corticosteroids                         | 1480           | 18,4% | 441                | 18,7% | 46                 | 15,6% | 181                  | 22,4% | 794                | 17,8% | 18                | 17,0% |
| Antihypertensives                       | 424            | 5,3%  | 118                | 5,0%  | 14                 | 4,7%  | 52                   | 6,4%  | 234                | 5,3%  | 6                 | 5,7%  |
| Anti-dyslipidaemic agents               | 2845           | 35,5% | 848                | 35,9% | 102                | 34,6% | 282                  | 34,9% | 1562               | 35,1% | 51                | 48,1% |

**Table S9.** History of proxy of diabetes-related eye disease, glaucoma, use of ophthalmic services and binocularity by age

|                                                                                              | <b>64-</b> |       | <b>65-69</b> |       | <b>70-74</b> |       | <b>75-79</b> |       | <b>80-84</b> |       | <b>85+</b> |       |
|----------------------------------------------------------------------------------------------|------------|-------|--------------|-------|--------------|-------|--------------|-------|--------------|-------|------------|-------|
| <b>TOTAL</b>                                                                                 | 3504       |       | 2026         |       | 2818         |       | 3174         |       | 2764         |       | 1940       |       |
| <b>Proxy of diabetes-related eye disease in the look-back period, No. of subjects, N (%)</b> |            |       |              |       |              |       |              |       |              |       |            |       |
| Diabetes                                                                                     | 1431       | 40.8% | 919          | 45.4% | 1066         | 37.8% | 967          | 30.5% | 756          | 27.4% | 406        | 20.9% |
| Argon-laser retina (and Laser photocoagulation)                                              | 492        | 14.0% | 221          | 10.9% | 217          | 7.7%  | 162          | 5.1%  | 80           | 2.9%  | 33         | 1.7%  |
| Younger than 55 at first injection                                                           | 1310       | 37.4% | 0            | 0.0%  | 0            | 0.0%  | 0            | 0.0%  | 0            | 0.0%  | 0          | 0.0%  |
| Any proxy among the previous                                                                 | 2363       | 67.4% | 958          | 47.3% | 1119         | 39.7% | 1029         | 32.4% | 788          | 28.5% | 422        | 21.8% |
| <b>Glaucoma, N (%)</b>                                                                       | 123        | 3.5%  | 96           | 4.7%  | 98           | 3.5%  | 120          | 3.8%  | 108          | 3.9%  | 72         | 3.7%  |
| <b>Use of ophthalmic services during in the look-back period, Mean (SD)</b>                  |            |       |              |       |              |       |              |       |              |       |            |       |
| Specialist encounter                                                                         | 1.9 (2.1)  |       | 2.1 (2.0)    |       | 2.1 (2.1)    |       | 2.1 (2.1)    |       | 2.0 (2.0)    |       | 1.8 (1.9)  |       |
| OCT                                                                                          | 0.0 (0.0)  |       | 0.0 (0.0)    |       | 0.0 (0.0)    |       | 0.0 (0.0)    |       | 0.0 (0.0)    |       | 0.0 (0.0)  |       |
| Fluorescence imaging                                                                         | 0.7 (0.8)  |       | 0.7 (0.9)    |       | 0.7 (0.9)    |       | 0.6 (0.9)    |       | 0.6 (0.9)    |       | 0.5 (0.8)  |       |
| Fluorescence imaging with indocyanine                                                        | 0.0 (0.0)  |       | 0.0 (0.0)    |       | 0.0 (0.0)    |       | 0.0 (0.0)    |       | 0.0 (0.0)    |       | 0.0 (0.0)  |       |
| Fundus photography                                                                           | 0.0 (0.2)  |       | 0.0 (0.2)    |       | 0.0 (0.1)    |       | 0.0 (0.1)    |       | 0.0 (0.1)    |       | 0.0 (0.1)  |       |
| <b>Possible binocularity during the first year of follow-up period, No of subjects (%)</b>   | 393        | 11.2% | 208          | 10.3% | 286          | 10.1% | 314          | 9.9%  | 253          | 9.2%  | 158        | 8.1%  |

**Table S10.** History of proxy of diabetes-related eye disease, glaucoma, use of ophthalmic services and binocularity by gender

|                                                                                              | <b>Male</b> |       | <b>Female</b> |       |
|----------------------------------------------------------------------------------------------|-------------|-------|---------------|-------|
| <b>TOTAL</b>                                                                                 | 7621        |       | 8605          |       |
| <b>Proxy of diabetes-related eye disease in the look-back period, No. of subjects, N (%)</b> |             |       |               |       |
| Diabetes                                                                                     | 3094        | 40.6% | 2451          | 28.5% |
| Argon-laser retina (and Laser photocoagulation)                                              | 728         | 9.6%  | 477           | 5.5%  |
| Younger than 55 at first injection                                                           | 676         | 8.9%  | 634           | 7.4%  |
| Any proxy among the previous                                                                 | 3649        | 47.9% | 3030          | 35.2% |
| <b>Glaucoma, N (%)</b>                                                                       | 287         | 3.8%  | 330           | 3.8%  |
| <b>Use of ophthalmic services during in the look-back period, Mean (SD)</b>                  |             |       |               |       |
| Specialist encounter                                                                         | 2.0 (2.0)   |       | 2.0 (2.1)     |       |
| OCT                                                                                          | 0.0 (0.0)   |       | 0.0 (0.0)     |       |
| Fluorescence imaging                                                                         | 0.7 (0.9)   |       | 0.6 (0.9)     |       |
| Fluorescence imaging with indocyanine                                                        | 0.0 (0.0)   |       | 0.0 (0.0)     |       |
| Fundus photography                                                                           | 0.0 (0.2)   |       | 0.0 (0.2)     |       |
| <b>Possible binocularity during the first year of follow-up period, No of subjects (%)</b>   | 752         | 9.9%  | 860           | 10.0% |
